# Supplementary material for: A novel antibody–drug conjugate targeting SAIL for the treatment of hematologic malignancies
Source: PubMed Central journal article supplement (PMC4476018; doi:10.1038/bcj.2015.39), 2015-05-29
Supplement: bcj201539x1.pdf [file bcj201539x1.pdf]

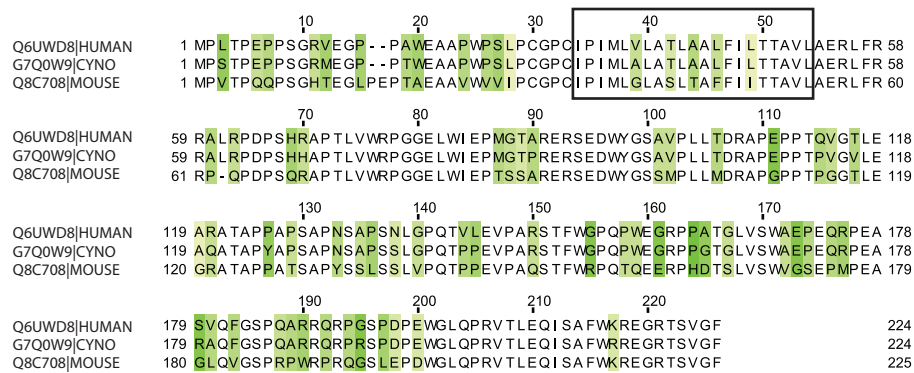

Figure S1. Multiple sequence alignment of SAIL protein between human, cynomolgus monkey and mouse. The Uniprot Accession Numbers for the input sequences are shown. Green-shaded boxes indicate divergent sequences. Predicted transmembrane domain is highlighted by black box.
