# Supplementary material for: A novel antibody–drug conjugate targeting SAIL for the treatment of hematologic malignancies
Source: PubMed Central journal article supplement (PMC4476018; doi:10.1038/bcj.2015.39), 2015-05-29
Supplement: bcj201539x4.pdf [file bcj201539x4.pdf]

| Cell/tissue type           | Sample size (N) | SAIL               |               |                     | CD33               |               |                     |
|----------------------------|-----------------|--------------------|---------------|---------------------|--------------------|---------------|---------------------|
|                            |                 | Mean %NSAF (STDEV) | P (two-sided) | Positive sample (%) | Mean %NSAF (STDEV) | P (two-sided) | Positive sample (%) |
| AML                        | 14              | 0.02 (0.04)        | NS            | 4 (28.6)            | 0.04 (0.05)        | NS            | 6 (42.9)            |
| Normal BMMC                | 21              | 0.01 (0.02)        |               | 2 (9.5)             | 0.01 (0.03)        |               | 6 (28.6)            |
| CLL                        | 40              | 0.27 (0.22)        | <0.001        | 36 (90.0)           | 0                  | NA            | 1 (2.5)             |
| Normal PBMC                | 20              | 0.01 (0.03)        |               | 3 (15)              | 0                  |               | 4 (20.0)            |
| MM                         | 33              | 0.003 (0.02)       | NS            | 1 (3.0)             | 0.06 (0.07)        | <0.05         | 18 (54.5)           |
| Normal BMMC                | 21              | 0.01 (0.02)        |               | 2 (9.5)             | 0.01 (0.03)        |               | 6 (28.6)            |
| Colorectal tumor           | 27              | 0                  | NA            | 0                   | 0                  | NA            | 0                   |
| Colorectal adjacent tissue | 22              | 0                  |               | 0                   | 0                  |               | 0                   |
| Lung tumor                 | 89              | 0                  | NA            | 0                   | 0                  | NA            | 0                   |
| Lung adjacent tissue       | 75              | 0                  |               | 0                   | 0                  |               | 0                   |
| Ovarian tumor              | 53              | 0                  | NA            | 0                   | 0                  | NA            | 0                   |
| Ovary adjacent tissue      | 10              | 0                  |               | 0                   | 0                  |               | 0                   |
| Pancreatic tumor           | 41              | 0                  | NA            | 0                   | 0                  | NA            | 0                   |
| Pancreas adjacent tissue   | 21              | 0                  |               | 0                   | 0                  |               | 0                   |
| Sarcoma                    | 14              | 0                  | ND            | 0                   | 0                  | NA            | 0                   |
| Sarcoma adjacent tissue    | ND              | ND                 |               | ND                  | ND                 |               | ND                  |

Table S1. Proteomic analysis of SAIL expression in various tumor and normal tissues. CD33 expression is shown as a comparator. The number of cases (N) tested for each tumor type is shown along with the mean of normalized spectral abundance factor (%NSAF), the standard deviation of %NSAF, the two-sided P-value (Wilcoxon rank sum test), and the percentage of positive samples. ND, not determined; NA, not applicable; NS, not significant.
