# Supplementary material for: A novel antibody–drug conjugate targeting SAIL for the treatment of hematologic malignancies
Source: PubMed Central journal article supplement (PMC4476018; doi:10.1038/bcj.2015.39), 2015-05-29
Supplement: bcj201539x5.pdf [file bcj201539x5.pdf]

| Tissue name               | Sample size | Score |
|---------------------------|-------------|-------|
| Adrenal gland             | 3           | 0     |
| Bladder urothelium        | 3           | 1-3   |
| Breast glands             | 1           | 0     |
| Cervix epithelium         | 5           | 0-1   |
| Colon mucosa              | 3           | 0     |
| Esophageal epithelium     | 3           | 1     |
| Gallbladder               | 3           | 1-2   |
| Kidney cortex             | 3           | 0     |
| Kidney medulla            | 2           | 0     |
| Liver                     | 1           | 0     |
| Lung alveoli & epithelia* | 2           | 0     |
| Lymph node                | 3           | 2-3   |
| Ovary                     | 3           | 0     |
| Pancreas acini & islets   | 3           | 1     |
| Parotid gland             | 3           | 0     |
| Prostate epithelia        | 2           | 0     |
| Spleen                    | 3           | 1     |
| Stomach                   | 3           | 0     |
| Testis                    | 3           | 0     |
| Thymus                    | 2           | 3     |
| Thyroid                   | 3           | 0     |
| Tonsil                    | 2           | 3     |
| Uterus epithelia          | 3           | 0-1   |

Table S2. RNA ISH analysis of SAIL expression in normal tissues generated from specific tissue specimens and normal tissue TMAs (Tristar and US Biomax). Staining intensity was scored on a 0 to 3 scale as described in Material and Methods. \* Macrophages ISH 2
